# Supplementary material
Source: PubMed Central journal article supplement (PMC5363296)
Supplement: mmc1.pdf [file mmc1.pdf]

**YMTHE, Volume 25**

**Supplemental Information**

**A Targeted and Stable Polymeric Nanoformulation**

**Enhances Systemic Delivery of mRNA to Tumors**

**Qixian Chen, Ruogu Qi, Xiyi Chen, Xi Yang, Sudong Wu, Haihua Xiao, and Wenfei Dong**

**Supplemental data items:**

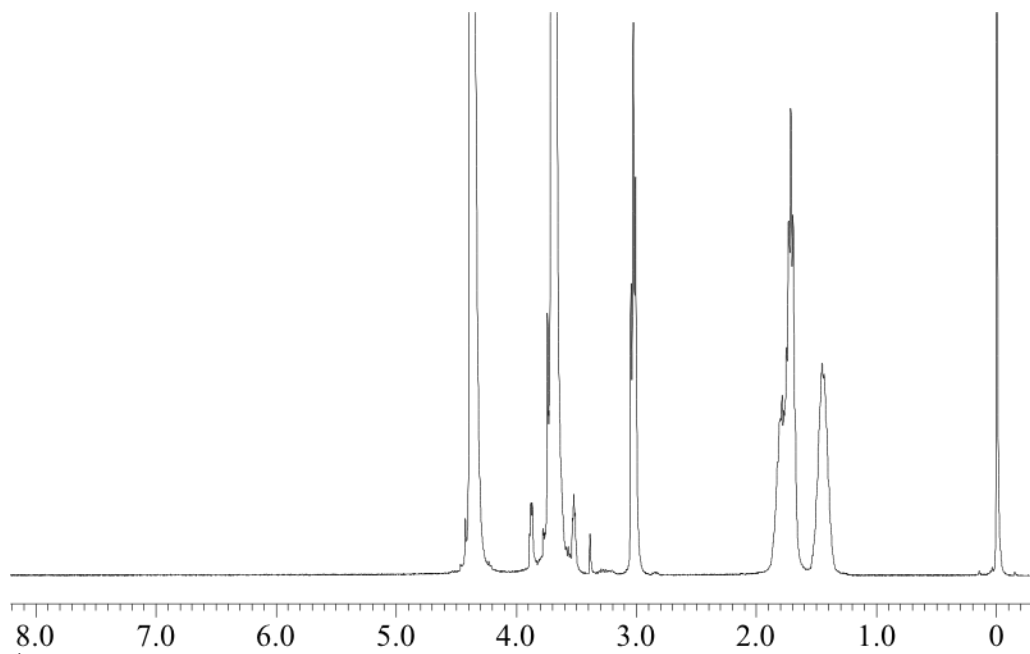

**Figure S1**  $^1\text{H}$ -NMR spectra of PEG-PLys in  $\text{D}_2\text{O}$  at  $80\text{ }^\circ\text{C}$ .

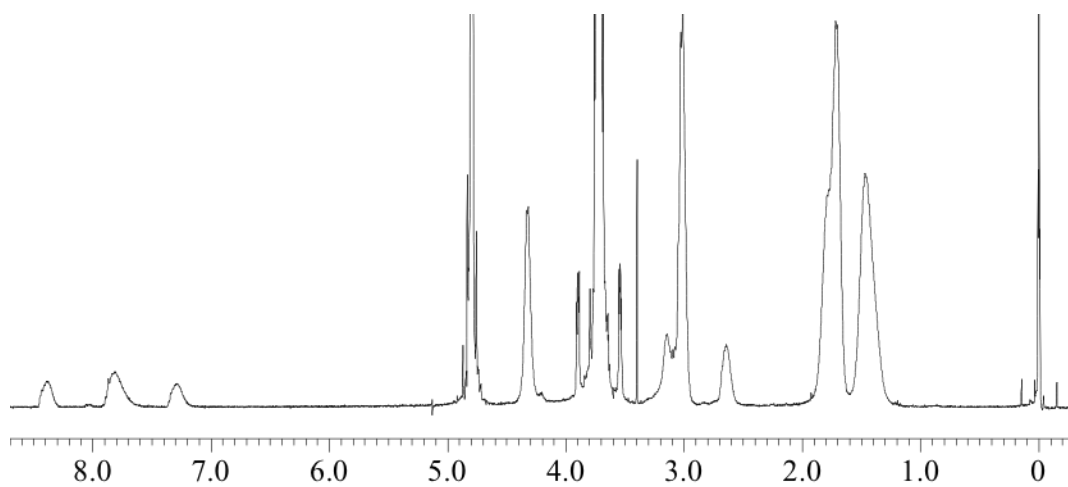

**Figure S2**  $^1\text{H}$ -NMR spectra of PEG-PLys(PDP) in  $\text{D}_2\text{O}$  at  $80\text{ }^\circ\text{C}$ .

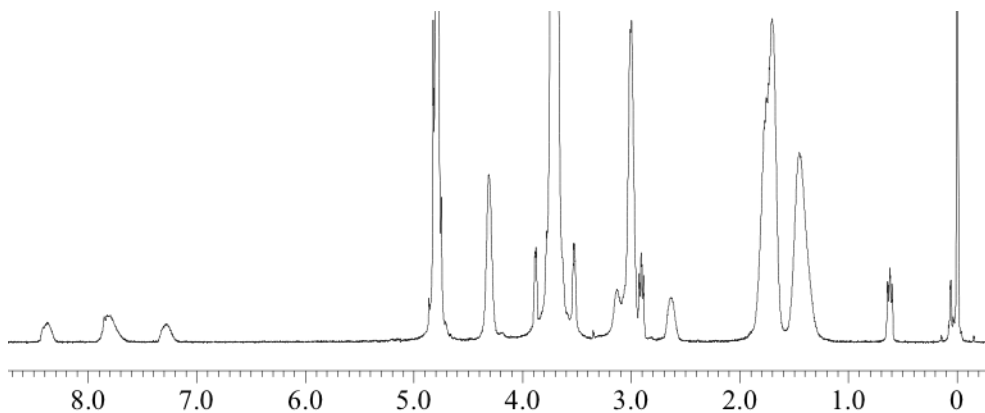

**Figure S3**  $^1\text{H-NMR}$  spectra of acetal PEG-PLys(PDP) in  $\text{D}_2\text{O}$  at  $80\text{ }^\circ\text{C}$ .

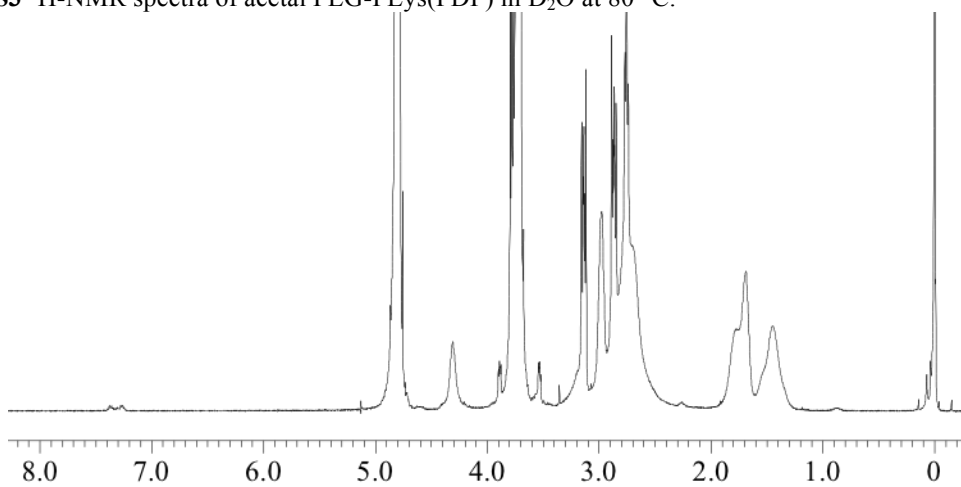

**Figure S4**  $^1\text{H-NMR}$  spectra of cRGD-PEG-PLys(PDP) in  $\text{D}_2\text{O}$  at  $80\text{ }^\circ\text{C}$ .

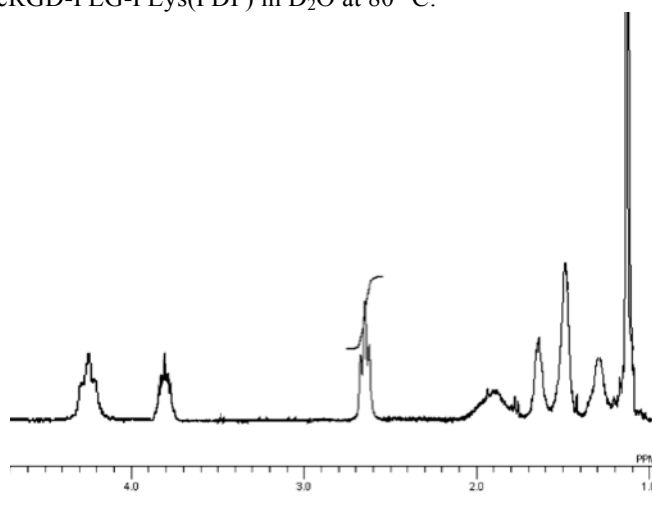

**Figure S5**  $^1\text{H-NMR}$  spectra of PNIPAM-PLys(PDP) in  $\text{D}_2\text{O}$  at  $20\text{ }^\circ\text{C}$ .

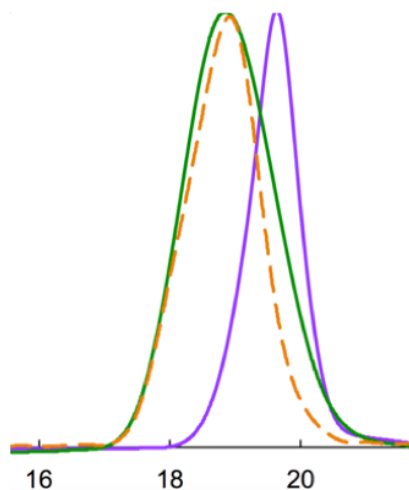

**Figure S6** GPC trace of PEG-PLys (orange), cRGD-PEG-PLys(SH) (green) and PNIPAM-PLys(SH) (purple).

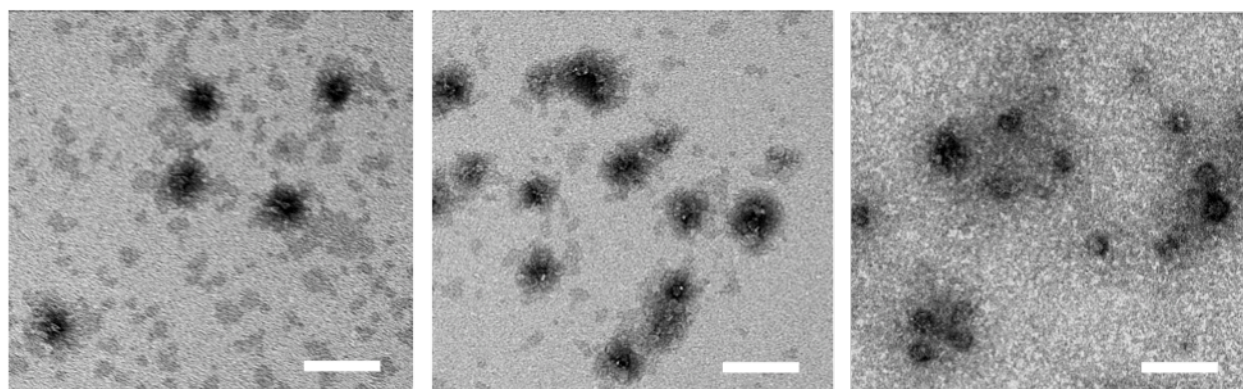

**Figure S7** TEM morphology of diverse polymeric formulations. Polymeric formulation of PEG-PLys(SH) (left), PEG/PNIPAM-PLys(SH) at 25 °C and PEG/PNIPAM-PLys(SH) at 37 °C. Scale bar: 200 nm.

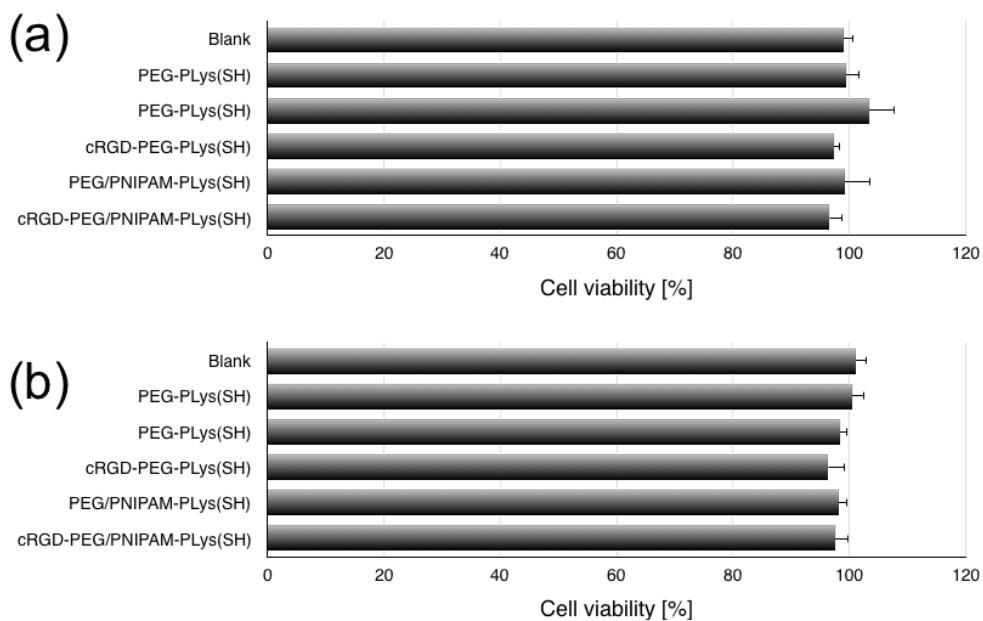

**Figure S8** Cell viability of U87 cells and HUVECs in presence of diverse polymeric formulations.

**Supplemental Methods:**

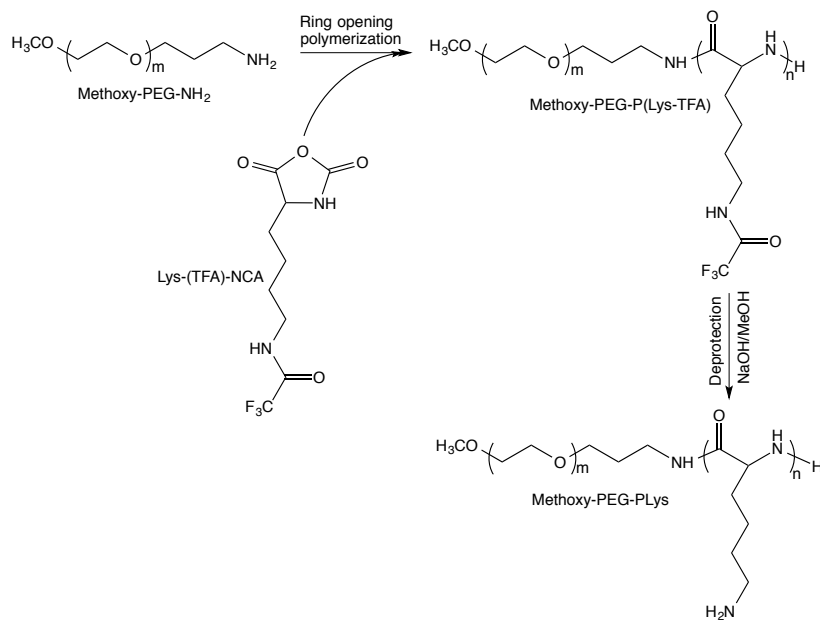

**Scheme S1** Synthetic scheme to prepare block copolymer PEG-PLys

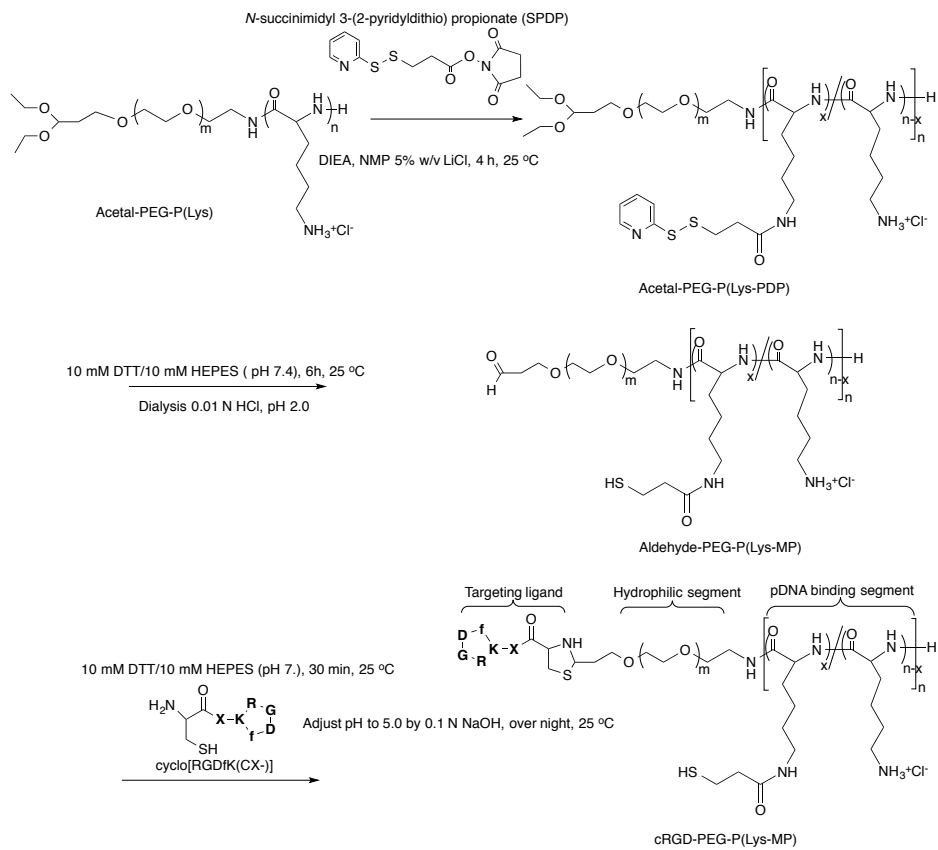

**Scheme S2** Synthetic scheme to prepare block copolymer cRGD-PEG-PLys(SH).

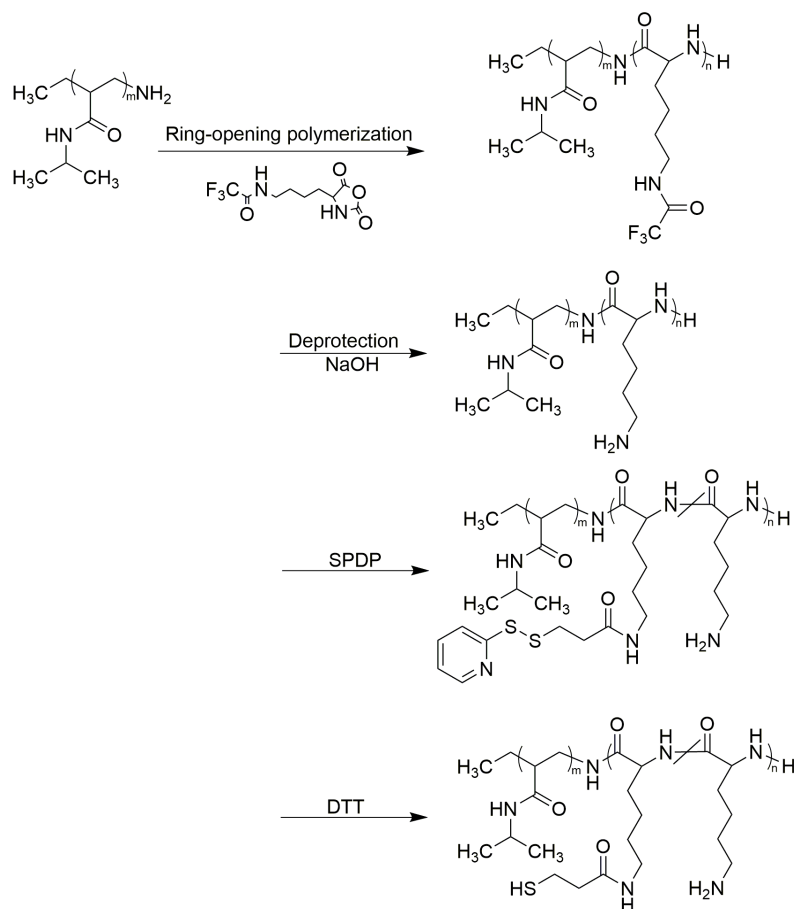

**Scheme S3** Synthetic scheme to prepare block copolymer PNIPAM-PLys(SH)

### Transmission electron microscopy (TEM) characterization

The morphology of polymeric formulations was observed using the H-7000 TEM machine (Hitachi Ltd., Tokyo, Japan) operated at an acceleration voltage of 75 kV. In brief, copper TEM grids (Nisshin EM Corp., Japan) containing carbon-coated collodion membrane were glow-discharged for 30 s using an Eiko IB-3 ion coater (Eiko Engineering Co. Ltd., Japan) for hydrophilization. The hydrophilized grids were immersed into uranyl acetate (UA) (2% w/v)-treated PM solutions for 30 s to achieve effective staining. The sample-deposited grids were blotted onto the filter paper to remove excess solution, followed by air-drying for 30 min. The grids were transferred to the TEM observation.

### Cytotoxicity

U87 cells [or Human Umbilical Vein Endothelial Cells (HUVECs)] were plated onto 24-well culture dishes (20,000 cells/well) (or collagen I coated 24-well culture dishes for HUVECs) in 400  $\mu$ l DMEM containing 10% FBS and 1% antibiotics (penicillin and streptomycin) (or HUVEC-Umbilical Vein Endo, EGM-2, amp AMP for HUVECs, Lonza, Basel, Switzerland) and incubated in a humidified atmosphere with 5% CO<sub>2</sub> at 37 °C. After 24 h of incubation, the medium was replaced with 400  $\mu$ l of fresh medium, followed by the addition of polymeric formulation solutions equivalent to 0.5  $\mu$ g of pDNA/well. After 24 h incubation, the medium was replaced with fresh medium, followed by another 24 h of incubation. The cells were washed three times with ice-cold PBS, followed by the addition of 200  $\mu$ l of fresh medium. Cell viability was assessed on the basis of 2-(2-methoxy-4-nitrophenyl)-3-(4-nitrophenyl)-5-(2,4-disulphophenyl)-2H-tetrazolium (WST-8) reduction to WST-8 formazan by the dehydrogenase

activity of viable cells using the Cell Counting Kit-8 (CCK-8) (Dojindo, Kumamoto, Japan) according to manufacturer's instructions. In brief, 20  $\mu$ l of the CCK-8 reagent was added to each well and allowed to develop orange-colored WST-8 formazan for 2 h. The UV absorbance of WST-8 formazan in each well was quantified at 450 nm using a microplate reader (Model 680, Bio-Rad, UK). The cell toxicity was expressed as the percentage of cell viability normalized against the control cells treated with 10 mM HEPES (pH 7.4) ( $n = 4$ ).
